# Supplementary material for: Comparative Analysis of Chloroplast Genome in Saccharum spp. and Related Members of ‘Saccharum Complex’
Source: MDPI journal article supplement (doi:10.3390/ijms23147661), 2022-07-11
Supplement: s1 [file s1]

**Table S1. The List of *Saccharum* and relative species included in this study.**

| Species                | Sample        | Region                                 | Description                                        |
|------------------------|---------------|----------------------------------------|----------------------------------------------------|
| <i>S. spontaneum</i>   | SP79-9        | Guangxi, China                         | Firstly sequenced and assembled in this study      |
|                        | IND84-066     | Coimbatore, India                      | From NCBI SRA database and assembled in this study |
|                        | SES14         | Coimbatore, India                      | From NCBI SRA database and assembled in this study |
|                        | IND81-013     | Coimbatore, India                      | From NCBI SRA database and assembled in this study |
| <i>S. robustum</i>     | NG57-208      | Papua New Guinea                       | Firstly sequenced and assembled in this study      |
|                        | NG51-63       | Papua New Guinea                       | Firstly sequenced and assembled in this study      |
|                        | IN84-076      | Baini, Sulawesi<br>Tenggara, Indonesia | Firstly sequenced and assembled in this study      |
|                        | IS76-184      | Palopo, South<br>Sulawesi, Indonesia   | Firstly sequenced and assembled in this study      |
| <i>S. sinense</i>      | Guilinzhuze   | Guangxi, China                         | Firstly sequenced and assembled in this study      |
|                        | Youba         | China                                  | Firstly sequenced and assembled in this study      |
| <i>S. barberi</i>      | Katha         | India                                  | Firstly sequenced and assembled in this study      |
|                        | Chunne        | India                                  | From NCBI SRA database and assembled in this study |
|                        | Kewali        | India                                  | Firstly sequenced and assembled in this study      |
| <i>S. officinarum</i>  | Loether       | Mexico                                 | Firstly sequenced and assembled in this study      |
|                        | Blackcheribon | Hainan, China                          | Firstly sequenced and assembled in this study      |
|                        | NG96-14       | Papua New Guinea                       | Firstly sequenced and assembled in this study      |
|                        | Christalin    | Unknown                                | Firstly sequenced and assembled in this study      |
| <i>S. hybrid</i>       | GT42          | Guangxi, China                         | Firstly sequenced and assembled in this study      |
|                        | POJ2878       | Java, Indonesia                        | Firstly sequenced and assembled in this study      |
|                        | ZhongzheNo1   | Guangxi, China                         | Firstly sequenced and assembled in this study      |
|                        | ROC25         | Taiwan, China                          | Firstly sequenced and assembled in this study      |
| <i>N. porphyrocoma</i> | HebawangNo1   | Guangxi, China                         | Firstly sequenced and assembled in this study      |
| <i>T. arundinaceum</i> | BM87-36       | Guangxi, China                         | Firstly sequenced and assembled in this study      |

**Table S2 The List of genes in the chloroplast genomes of Saccharinae species were assembled in this study.**

| Category of genes                    | Group of genes                      | Name of genes                                                                                                                                                                                                                                                                                                                                                                                                                                                                                                       |
|--------------------------------------|-------------------------------------|---------------------------------------------------------------------------------------------------------------------------------------------------------------------------------------------------------------------------------------------------------------------------------------------------------------------------------------------------------------------------------------------------------------------------------------------------------------------------------------------------------------------|
| Photosynthesis genes                 | Subunits of photosystem I           | <i>psaA, psaB, psaC, psaI, psaJ</i>                                                                                                                                                                                                                                                                                                                                                                                                                                                                                 |
|                                      | Subunits of photosystem II          | <i>psbA, psbB, psbC, psbD, psbE, psbF, psbI, psbJ, psbK, psbL, psbM, psbN, psbT, psbZ, ycf3</i>                                                                                                                                                                                                                                                                                                                                                                                                                     |
|                                      | Subunits of Cytochrome b6/f/complex | <i>petA, petB, petD, petG, petL, petN</i>                                                                                                                                                                                                                                                                                                                                                                                                                                                                           |
|                                      | Subunits of ATP synthase            | <i>atpA, atpB, atpE, atpF, atpH, atpI</i>                                                                                                                                                                                                                                                                                                                                                                                                                                                                           |
|                                      | Subunits of Rubisco                 | <i>rbcL</i>                                                                                                                                                                                                                                                                                                                                                                                                                                                                                                         |
|                                      | Subunits of NADH-dehydrogenase      | <i>ndhA, ndhB<sup>×2</sup>, ndhC, ndhD, ndhE, ndhF, ndhG, ndhH, ndhI, ndhJ, ndhK</i>                                                                                                                                                                                                                                                                                                                                                                                                                                |
| Self-replicating genes               | Large subunit ribosomal proteins    | <i>rpl14, rpl16, rpl2<sup>×2</sup>, rpl20, rpl22, rpl23, rpl32, rpl33, rpl36</i>                                                                                                                                                                                                                                                                                                                                                                                                                                    |
|                                      | Small subunit ribosomal proteins    | <i>rps11, rps12<sup>×2</sup>, rps14, rps15<sup>×2</sup>, rps16, rps18, rps19<sup>×2</sup>, rps2, rps3, rps4, rps7<sup>×2</sup>, rps8</i>                                                                                                                                                                                                                                                                                                                                                                            |
|                                      | DNA dependent RNA polymerase        | <i>rpoA, rpoB, rpoC1, rpoC2</i>                                                                                                                                                                                                                                                                                                                                                                                                                                                                                     |
|                                      | Ribosomal RNA genes                 | <i>rrn16S<sup>×2</sup>, rrn23S<sup>×2</sup>, rrn4.5S<sup>×2</sup>, rrn5S<sup>×2</sup><br/>trnA-UGC<sup>×2</sup>, trnC-GCA, trnD-GUC, trnE-UUC, trnF-GAA, trnG-GCC, trnG-UCC, trnH-GUG<sup>×2</sup>, trnI-CAU<sup>×2</sup>, trnI-GAU<sup>×2</sup>, trnK-UUU, trnL-CAA<sup>×2</sup>, trnL-UAA, trnL-UAG, trnM-CAU<sup>×2</sup>, trnN-GUU<sup>×2</sup>, trnP-UGG, trnQ-UUG, trnR-ACG<sup>×2</sup>, trnR-UCU, trnS-GCU, trnS-GGA, trnS-UGA, trnT-GGU, trnT-UGU, trnV-GAC<sup>×2</sup>, trnV-UAC, trnW-CCA, trnY-GUA</i> |
|                                      | Transfer RNA genes                  |                                                                                                                                                                                                                                                                                                                                                                                                                                                                                                                     |
| Other genes                          | Envelop membrane protein            | <i>cemA</i>                                                                                                                                                                                                                                                                                                                                                                                                                                                                                                         |
|                                      | Translational initiation factor     | <i>infA</i>                                                                                                                                                                                                                                                                                                                                                                                                                                                                                                         |
|                                      | c-type cytochrome synthesis gene    | <i>ccsA</i>                                                                                                                                                                                                                                                                                                                                                                                                                                                                                                         |
|                                      | ATP-dependent/Protease              | <i>clpP</i>                                                                                                                                                                                                                                                                                                                                                                                                                                                                                                         |
|                                      | Maturase                            | <i>matK</i>                                                                                                                                                                                                                                                                                                                                                                                                                                                                                                         |
| Unknown function protein-coding gene |                                     | <i>ycf4</i>                                                                                                                                                                                                                                                                                                                                                                                                                                                                                                         |
